# Supplementary material
Source: publisher figshare collection journal article supplement (https://frontiersin.figshare.com/ndownloader/files/22787756)
Supplement: Supplementary file [file 22787756]

***Supplementary Material***  
**for**

**A nitrate-blind *P. putida* strain boosts PHA production in a  
synthetic mixed culture**

by

Karina Hobmeier, Hannes Löwe, Stephan Liefeldt, Andreas Kremling, Katharina Pflüger-Grau\*

**\* Correspondence:**  
Katharina Pflüger-Grau  
k.pflueger-grau@tum.de



**Supplementary Table S1: Nitrogen source and concentration used in this study.** Shown are the type of nitrogen source, the concentration used in the different experiments of this study, as well as the carbon source. In the first column reference is given to the respective figure.

| Experiment                       | Strain                                      | NH <sub>4</sub> Cl | NaNO <sub>3</sub> | C source        |
|----------------------------------|---------------------------------------------|--------------------|-------------------|-----------------|
| <b>Figure 1</b>                  | <i>P. putida</i> EM178, AM                  | 0.22 g/L           | ---               | Glucose         |
|                                  | <i>P. putida</i> EM178 $\Delta nasT$ , AM   | 0.22 g/L           | ---               |                 |
|                                  | <i>P. putida</i> EM178, AM+N                | 0.22 g/L           | 0.10 g/L          |                 |
|                                  | <i>P. putida</i> EM178 $\Delta nasT$ , AM+N | 0.22 g/L           | 0.10 g/L          |                 |
| <b>Figure S1</b>                 | <i>P. putida</i> EM178                      | ---                | 0.10 g/L          | Glucose         |
|                                  | <i>P. putida</i> EM178 $\Delta nasT$        | ---                | 0.10 g/L          |                 |
| <b>Figure 2</b>                  | <i>P. putida cscRABY</i> , AM+N             | 0.03 g/L           | 1.00 g/L          | Sucrose         |
|                                  | <i>P. putida cscRABY</i> , AM               | 0.03 g/L           | ---               |                 |
|                                  | <i>P. putida cscRABY \Delta nasT</i> , AM+N | 0.03 g/L           | 1.00 g/L          |                 |
| <b>Figure 3<br/>(Co-culture)</b> | <i>S. elongatus cscB</i>                    | ---                | 1.50 g/L          | CO <sub>2</sub> |
|                                  | <i>S. elongatus cscB</i>                    | 0.03 g/L           | 1.50 g/L          | CO <sub>2</sub> |
|                                  | <i>P. putida cscRABY</i> , AM+N             | 0.06 g/L           | 1.50 g/L          | Sucrose         |
|                                  |                                             | 0.12 g/L           | 1.50 g/L          |                 |
|                                  | <i>S. elongatus cscB</i>                    | 0.03 g/L           | 1.50 g/L          | CO <sub>2</sub> |
|                                  | <i>P. putida cscRABY \Delta nasT</i> , AM+N | 0.06 g/L           | 1.50 g/L          | Sucrose         |
|                                  |                                             | 0.12 g/L           | 1.50 g/L          |                 |

**Supplementary Table S2: Strains used in this study and how they are designated in the text.** Additionally, the C-source used for the respective strain in this study is shown.

| Strains                                                  | Designation                          | C source        | Reference                       |
|----------------------------------------------------------|--------------------------------------|-----------------|---------------------------------|
| <i>S. elongatus cscB</i>                                 | <i>S. elongatus cscB</i>             | CO <sub>2</sub> | (Ducat et al., 2012)            |
| <i>P. putida</i> EM178                                   | <i>P. putida</i> EM178               | Glucose         | Obtained from Víctor de Lorenzo |
| <i>P. putida</i> EM178 $\Delta nasT$                     | <i>P. putida</i> EM178 $\Delta nasT$ | Glucose         | this work                       |
| <i>P. putida</i> EM178 attTn7::cscRAB-scrY               | <i>P. putida cscRABY</i>             | Sucrose         | (Löwe et al., 2018)             |
| <i>P. putida</i> EM178 attTn7::cscRAB-scrY $\Delta nasT$ | <i>P. putida cscRABY \Delta nasT</i> | Sucrose         | this work                       |



**Supplementary Table S3: Distribution of chain-lengths per mass fraction in PHA produced by *P. putida cscRABY ΔnasT* in the mixed culture.** As comparison the distribution of chain-length from the co-cultivation under nitrate limiting conditions is shown (Löwe et al., 2017).

| Chain length<br>(carbon number) | Mass fraction (%) |                   |
|---------------------------------|-------------------|-------------------|
|                                 | This study        | Löwe et al., 2017 |
| 6                               | 0                 | 4.2               |
| 8                               | 23.2              | 25.2              |
| 10                              | 62.4              | 58.4              |
| 12                              | 6.0               | 4.4               |
| 12:1                            | 8.4               | 7.8               |

**Supplementary Table S4: Oligonucleotides used in this study.** Restriction sites are shown in minuscules and homologous regions for recombination are underlined.

| Oligo name      | Sequence 5' -> 3'                                     | Function                                                                                       |
|-----------------|-------------------------------------------------------|------------------------------------------------------------------------------------------------|
| nasT ko fw1     | TTTTgaattcCGGGATCAGCGCAAAGC<br>CGAAC                  | Amplification of the upstream fragment<br>for the construction of pSEVA212S-<br><i>ΔnasT</i>   |
| nasT ko rv1     | <u>GTGAGGGGGACGAACT</u> GCGCTGAA<br>AATTCCGAGCAAGC    |                                                                                                |
| nasT ko fw2     | <u>GGAATTTTCAGCGCA</u> GTTTCGTCCCC<br>CTCACGCGCCGACAC | Amplification of the downstream<br>fragment for the construction of<br>pSEVA212S- <i>ΔnasT</i> |
| nasT ko rv2     | AAAAaagcttTGGTGCCACCGGCGCA<br>GATG                    |                                                                                                |
| fwP_nasT_orient | CGCCAGGGTTTTCCCAGTCAC                                 | Identification of recombination site                                                           |
| fwP_nasT_seq    | ATGAACCACCAGCTGTCACG                                  | PCR and sequencing primers                                                                     |
| rvP_nasT_seq    | TGACCAACCCTGAGGCACTG                                  |                                                                                                |



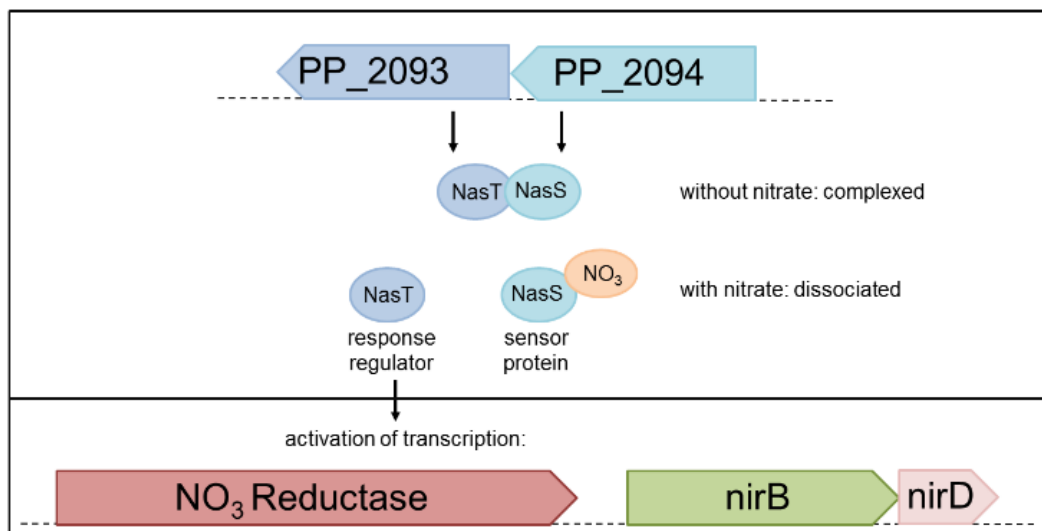

**Supplementary Figure S1. Nitrate sensing NasT/NasS two-component system of *P. putida*.** The availability of nitrate or nitrite is detected by the sensory protein NasS (encoded by PP\_2093), which forms the stable complex with NasT (encoded by PP\_2094). Upon substrate binding, NasS dissociates from the complex and NasT is released. The unbound NasT protein then activates transcription of the assimilating nitrate reductase, encoded by PP\_1703 and the nitrite reductases encoded *nirBD* (PP\_1705, PP\_1706), responsible for the reduction of nitrate to ammonium.



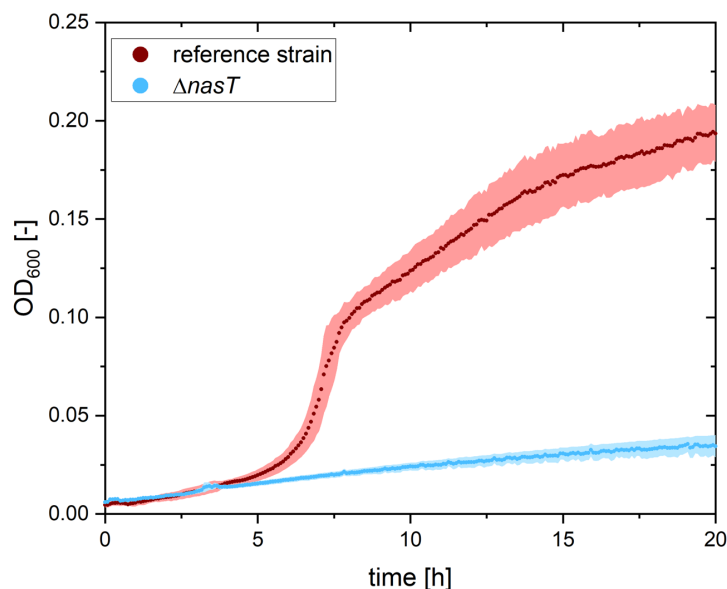

**Supplementary Figure S2. *P. putida*  $\Delta nasT$  cannot grow with  $\text{NaNO}_3$  as sole nitrogen source.** Shown is the optical density measured at 600 nm for *P. putida* EM178 (red) and *P. putida* EM178  $\Delta nasT$  (blue) grown on glucose in M9 minimal medium with  $\text{NaNO}_3$  as sole N-source in a 96-well plate. The small linear increase in optical density in the culture of *P. putida*  $\Delta nasT$  can be attributed a carry-over of  $\text{NH}_4\text{Cl}$  from the preculture during inoculation (in the first 3 hours) and to evaporation from the wells of the 96-well plate incubated at 30°C. The lines represent the mean of 3 replicates and the shaded area the standard deviation.

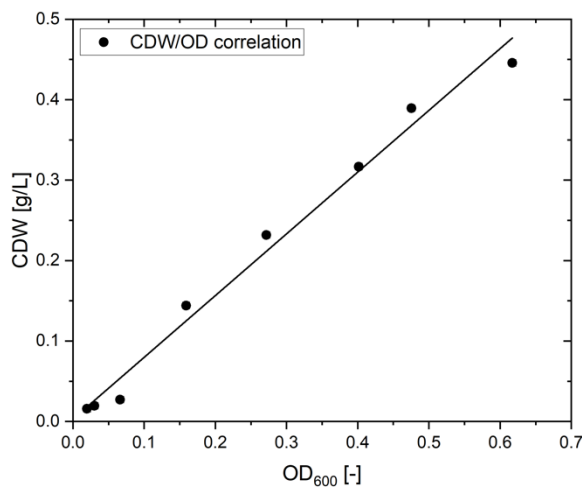

**Supplementary Figure S3. Correlation of CDW and optical densities OD<sub>600</sub> for *P. putida* EM178.** Data was obtained from three biological replicates of *P. putida* EM178 grown in M9 minimal medium with glucose as the sole carbon source in shaking flasks. The plots were fitted using linear regression to determine the correlation coefficient.



|                                                                  |                            |
|------------------------------------------------------------------|----------------------------|
| <i>S. elongatus cscB</i> 2x                                      | 0 g/L NH <sub>4</sub>      |
| <i>S. elongatus cscB</i> + <i>P. putida</i> ref                  | / 0.03 g/L NH <sub>4</sub> |
|                                                                  | = 0.06 g/L NH <sub>4</sub> |
|                                                                  | \ 0.12 g/L NH <sub>4</sub> |
| <i>S. elongatus cscB</i> + <i>P. putida</i> $\Delta$ <i>nasT</i> | / 0.03 g/L NH <sub>4</sub> |
|                                                                  | = 0.06 g/L NH <sub>4</sub> |
|                                                                  | \ 0.12 g/L NH <sub>4</sub> |

**Supplementary Figure S4. Experimental setup of the co-cultivation experiments.** As control two mono-cultures of *S. elongatus cscB* were conducted. Three co-cultivations were performed with *P. putida cscRABY*  $\Delta$ *nasT* and *P. putida cscRABY* (ref) with varying ammonium concentrations as indicated.

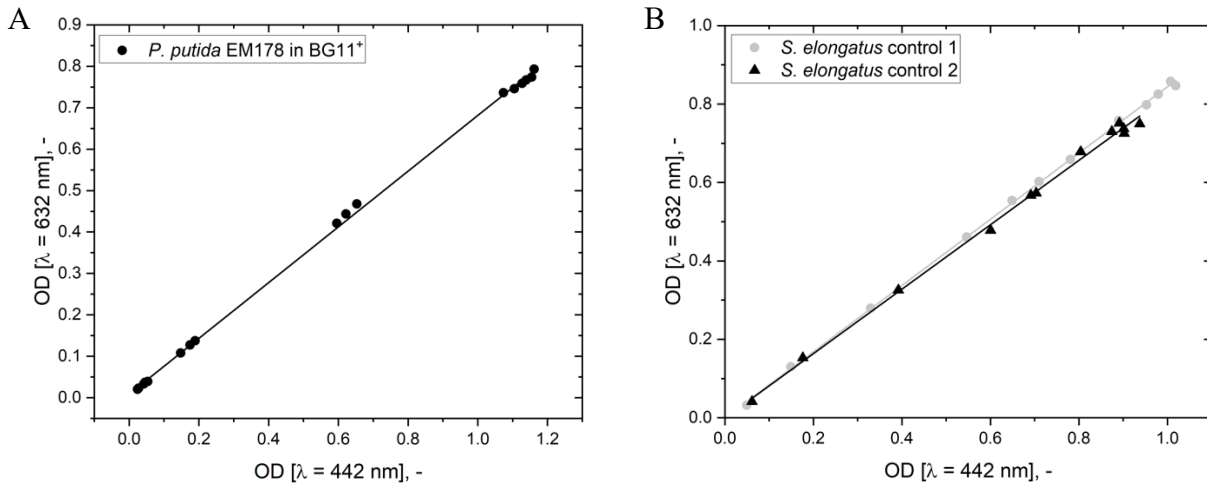

**Supplementary Figure S5. Correlation of optical densities (OD) measured at wavelengths of 442 nm and 632 nm for *P. putida* EM178 (A) and *S. elongatus cscB* (B).** *P. putida* was cultured in BG11<sup>+</sup> medium with a mixture of glucose and fructose, 1.5 g/L each, as carbon source in shaking flasks. The data for *S. elongatus cscB* was obtained from two replicates as part of the mixed culture experiments. The plots were fitted using linear regression to determine the correlation coefficients.



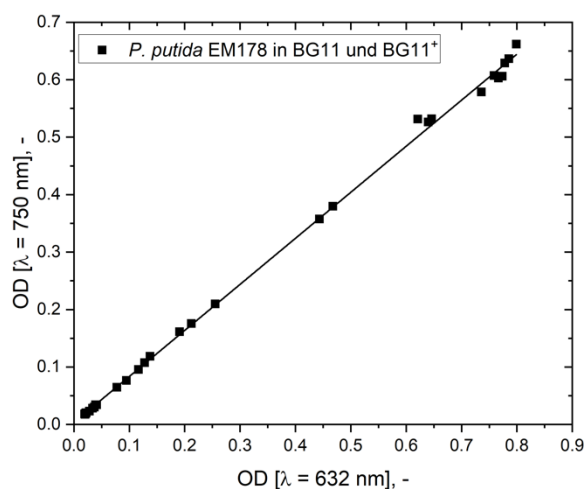

**Supplementary Figure S6. Correlations of optical densities (OD) measured at wavelengths of 632 nm and 750 nm for *P. putida* EM178.** Data was obtained from five biological replicates of *P. putida* EM178 grown as mono-culture in BG11 (2 replicates) and BG11<sup>+</sup> medium (3 replicates) with glucose and fructose 1.5 g/L each as carbon source. The plots were fitted using linear regression to determine the correlation coefficient.



## Materials and Methods

### Growth on nitrate in 96-well plate (Fig. S2)

A 96-well plate screening in M9-based medium containing 0.1 g/L NaNO<sub>3</sub> as sole N-source (6.77 g/L Na<sub>2</sub>HPO<sub>4</sub>, 2.99 g/L KH<sub>2</sub>PO<sub>4</sub>, 0.5 g/L NaCl, 0.1 g/L NaNO<sub>3</sub>, 0.24 g/L MgSO<sub>4</sub>, 20 g/L Glucose) was performed. Initially, a single colony was picked of either strain, *P. putida* EM178 or *P. putida* EM178  $\Delta nasT$ , and grown in LB medium. This was done in biological triplicates. Subsequently, an intermediate culture in M9 medium with 1 g/L NH<sub>4</sub>Cl as N-source and 5 g/L glucose as C-source was inoculated using an aliquot of the LB precultures. When these cultures reached the exponential growth phase, an aliquot was transferred to the main culture with only NaNO<sub>3</sub> to an initial OD of 0.01 in a 96-well plate with a volume of 0.2 mL. The cultures were incubated in an automated microplate reader (Tecan) at 30 °C and the optical density at 600 nm was followed for the next 20 hours. The whole experiment was conducted in biological triplicates and the mean and standard deviation were calculated.

## Literature

Ducat, D. C., Avelar-Rivas, J. A., Way, J. C., and Silver, P. A. (2012). Rerouting carbon flux to enhance photosynthetic productivity. *Appl Environ Microbiol* 78, 2660–2668. doi:10.1128/AEM.07901-11.

Löwe, H., Schmauder, L., Hobmeier, K., Kremling, A., and Pflüger-Grau, K. (2017). Metabolic engineering to expand the substrate spectrum of *Pseudomonas putida* toward sucrose. *Microbiologyopen* 6. doi:10.1002/mbo3.473.

Löwe, H., Sinner, P., Kremling, A., and Pflüger-Grau, K. (2018). Engineering sucrose metabolism in *Pseudomonas putida* highlights the importance of porins. *Microb Biotechnol*. doi:10.1111/1751-7915.13283.
